# Supplementary material for: Germinative and Post-Germinative Behaviours of Brassica napus Seeds Are Impacted by the Severity of S Limitation Applied to the Parent Plants
Source: MDPI journal article supplement (doi:10.3390/plants8010012), 2019-01-05
Supplement: s1 [file s1]

# Supplementary Materials:

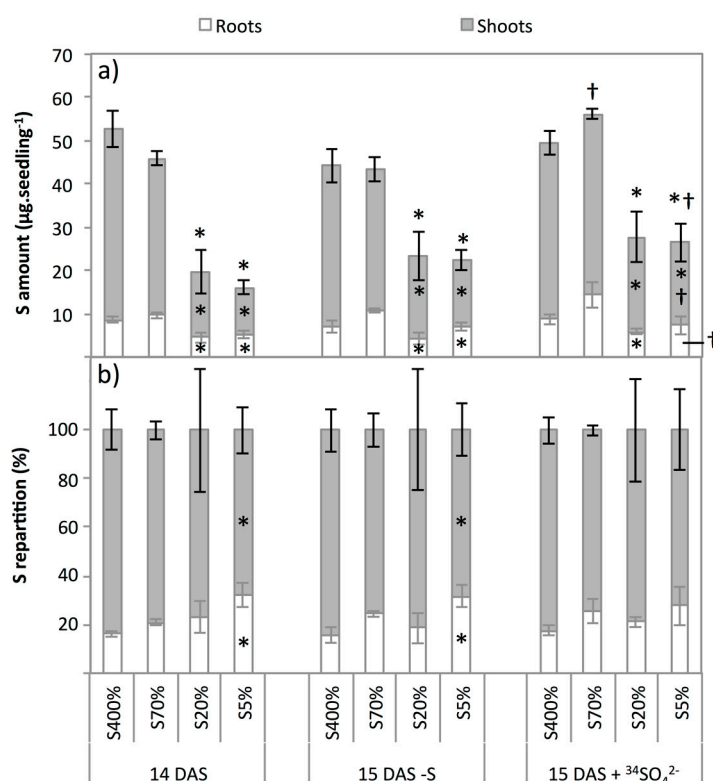

Figure S1: S amount (a) and S repartition (b) of *Brassica napus* cv. Yudal green seedlings, 14 days after sowing on water (14 DAS) and after 24 h treatment of 14 DAS green seedlings with 508.7  $\mu\text{M}$   $^{34}\text{SO}_4^{2-}$  at 5 atom% excess (15 DAS +  $^{34}\text{SO}_4^{2-}$ ) and with 8.7  $\mu\text{M}$   $\text{SO}_4^{2-}$  (15 DAS -S). \* Significant difference from the value of S400% green seedlings ( $p < 0.05$ ). † Significant difference from the corresponding value at 14 DAS ( $p < 0.05$ ). Signs (\* and/or †) on the top of the bars are for the whole plant (shoot and root) while signs inside the bar are for root or shoot specifically.

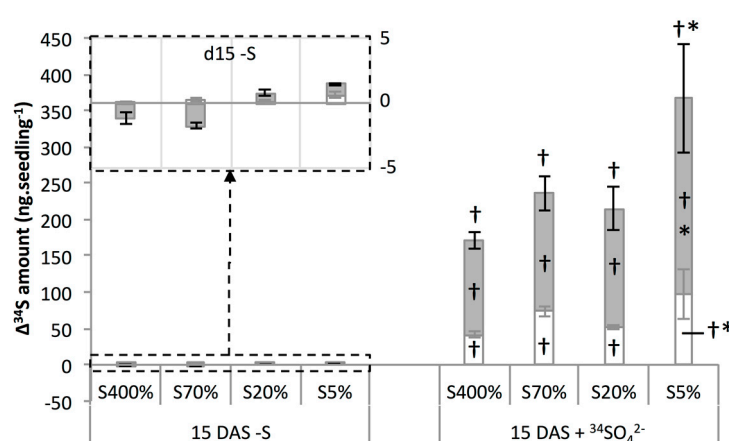

Figure S2: Differences in  $^{34}\text{S}$  amount in excess in roots and shoots of oilseed rape green seedlings (cv. Yudal) between 14 and 15 DAS -S and between 14 and 15 DAS +  $^{34}\text{SO}_4^{2-}$ . \* Significant difference from the value of S400% green seedlings ( $p < 0.05$ ). † Significant difference from the corresponding value with 15 DAS -S ( $p < 0.05$ ). Signs (\* and/or †) on the top of the bars are for the whole plant (shoot and root) while signs inside the bar are for root or shoot specifically.

Table S1: Plant dry weight, seed yield, number of seeds per plant and seed dry weight at harvest for plants well supplied with S and grown under S-limited conditions. Values correspond to means  $\pm$  SE ( $n = 3$ ). Plants were either grown under plethoric S nutrition (400% of plant S needs provided, S400% seeds) or subjected to a S limitation from the beginning of plant growth with 70%, 20% and 5% of plant S needs provided (S70%, S20% and S5% seeds respectively). Seed yield was determined without any sorting. The slight discrepancy observed between the calculation of seed yield from ‘seed dry weight’  $\times$  ‘number of seeds per plant’ and the reported values of seed yield is due to the manual removal of some seed fragments when seeds were counted and weighted. \* Significant difference from the value of S400% ( $p < 0.05$ ).

|       | Plant dry weight<br>(gDW·plant <sup>-1</sup> ) | Seed yield<br>(gDW·plant <sup>-1</sup> ) | Number of<br>seeds per plant | Seed dry weight<br>(mg·seed <sup>-1</sup> ) |
|-------|------------------------------------------------|------------------------------------------|------------------------------|---------------------------------------------|
| S400% | 25.37 $\pm$ 0.69                               | 3.82 $\pm$ 0.63                          | 1034 $\pm$ 220               | 3.95 $\pm$ 0.24                             |
| S70%  | 23.53 $\pm$ 0.86                               | 3.53 $\pm$ 0.49                          | 893 $\pm$ 173                | 4.12 $\pm$ 0.07                             |
| S20%  | 20.35 $\pm$ 1.2                                | 3.76 $\pm$ 0.55                          | 967 $\pm$ 189                | 4.01 $\pm$ 0.25                             |
| S5%   | 16.34 $\pm$ 1.32*                              | 1.13 $\pm$ 0.16*                         | 304 $\pm$ 58*                | 3.85 $\pm$ 0.43                             |
